# Supplementary material
Source: PubMed Central journal article supplement (PMC6971788)

SUPPLEMENTARY DATA

**Supplementary Table 1. Mortality according to metabolic parameters on admission among patients presenting with hyperglycemic crises**

|                                | OR (95% CI)      | Adjusted OR <sup>a</sup> | Adjusted OR <sup>b</sup> |
|--------------------------------|------------------|--------------------------|--------------------------|
| <b>Glucose</b>                 |                  |                          |                          |
| Q1 (lowest BG)                 | 1.00 (Reference) | 1.00 (Reference)         | 1.00 (Reference)         |
| Q2                             | 2.23 (0.99,5.01) | 1.81 (0.75,4.37)         | 1.87 (0.76,4.58)         |
| Q3                             | 1.71 (0.74,3.98) | 1.21 (0.47,3.14)         | 1.14 (0.43,3.01)         |
| Q4                             | 2.1 (0.93,4.75)  | 1.66 (0.67,4.08)         | 1.63 (0.65,4.09)         |
| <b>Osmolality</b>              |                  |                          |                          |
| Q1 (lowest osmolality)         | 1.00 (Reference) | 1.00 (Reference)         | 1.00 (Reference)         |
| Q2                             | 0.83 (0.35,1.96) | 0.59 (0.24,1.47)         | 0.6 (0.23,1.53)          |
| Q3                             | 0.99 (0.44,2.25) | 0.66 (0.27,1.58)         | 0.68 (0.28,1.66)         |
| Q4                             | 2.52 (1.25,5.08) | 1.12 (0.5,2.51)          | 1.11 (0.49,2.52)         |
| <b>HCO<sub>3</sub></b>         |                  |                          |                          |
| Q1 (highest HCO <sub>3</sub> ) | 1.00 (Reference) | 1.00 (Reference)         | 1.00 (Reference)         |
| Q2                             | 2.03 (0.92,4.51) | 3.62 (1.44,9.13)         | 3.40 (1.33,8.72)         |
| Q3                             | 2.60 (1.15,5.9)  | 3.17 (1.24,8.08)         | 3.40 (1.31,8.86)         |
| Q4                             | 1.31 (0.55,3.1)  | 3.09 (1.11,8.62)         | 3.55(1.25,10.09)         |

<sup>a</sup> Model adjusted for age, gender, BMI, race

<sup>b</sup> Model adjusted for age, gender, BMI, race, and Charlson Comorbidity Index. Analysis conducted including all categories of hyperglycemic crises, since metabolic parameters are part of the diagnostic criteria and analysis of subgroups is not feasible.

SUPPLEMENTARY DATA

**Supplementary Figure 1.** Correlation between effective osmolality and total osmolality among patients with hyperglycemic crises. Pearson Correlation Coefficient: 0.91.  $p < 0.0001$  (N = 1211). Effective osmolality values of 300, 320, and 350 mOsm/kg

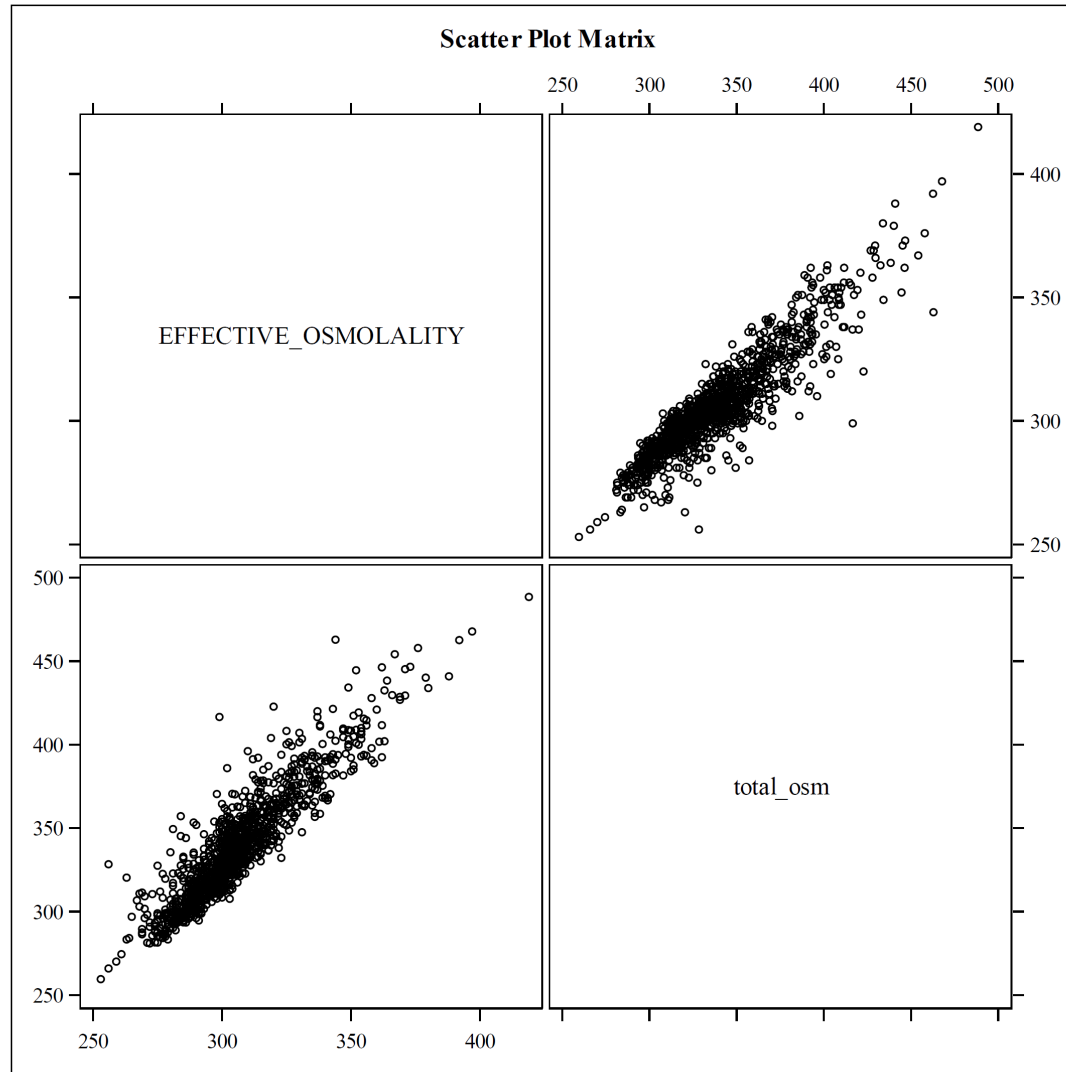

SUPPLEMENTARY DATA

**Supplementary Figure 2. Age and Hyperosmolality as Predictors of Case Fatalities in Patients with Hyperglycemic Crises.** A) Age > 50 and Effective Osmolality  $\geq 300$  mOsm/kg (c-statistic: 0.70); B) Age > 60 and Effective Osmolality  $\geq 300$  mOsm/kg (cstatistic: 0.71); Age > 65 and Effective Osmolality  $\geq 300$  mOsm/kg (c-statistic: 0.71).

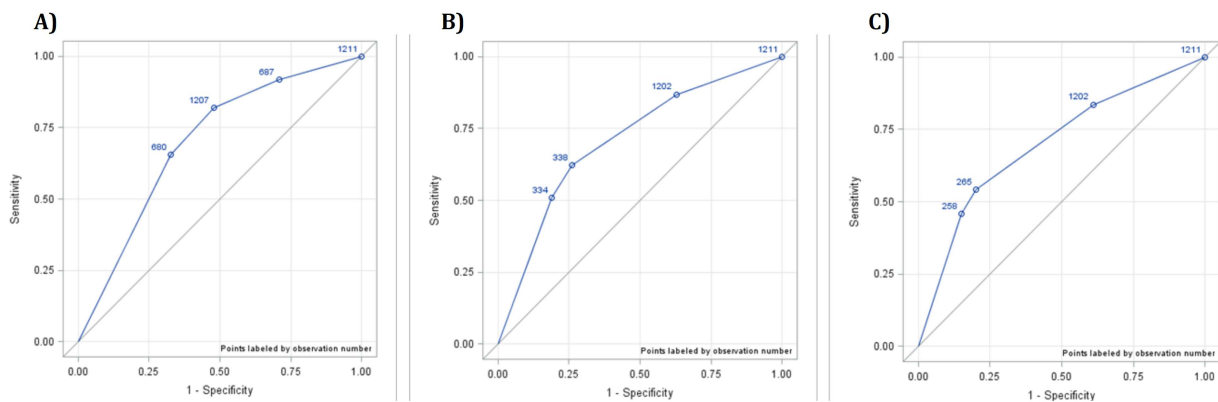

Supplement: DC191168SupplementaryData.pdf [file DC191168SupplementaryData.pdf]
